# Supplementary material for: Glycocalyx dysregulation impairs blood–brain barrier in ageing and disease
Source: Springer Nature journal article supplement (doi:10.1038/s41586-025-08589-9), 2025-02-26
Supplement: MOESM2 [file 41586_2025_8589_MOESM2_ESM.pdf]

Reporting Summary

Nature Portfolio wishes to improve the reproducibility of the work that we publish. This form provides structure for consistency and transparency in reporting. For further information on Nature Portfolio policies, see our [Editorial Policies](#) and the [Editorial Policy Checklist](#).

Statistics

For all statistical analyses, confirm that the following items are present in the figure legend, table legend, main text, or Methods section.

| n/a                                 | Confirmed                                                                                                                                                                                                                                                                                      |
|-------------------------------------|------------------------------------------------------------------------------------------------------------------------------------------------------------------------------------------------------------------------------------------------------------------------------------------------|
| <input type="checkbox"/>            | <input checked="" type="checkbox"/> The exact sample size ( <i>n</i> ) for each experimental group/condition, given as a discrete number and unit of measurement                                                                                                                               |
| <input type="checkbox"/>            | <input checked="" type="checkbox"/> A statement on whether measurements were taken from distinct samples or whether the same sample was measured repeatedly                                                                                                                                    |
| <input type="checkbox"/>            | <input checked="" type="checkbox"/> The statistical test(s) used AND whether they are one- or two-sided<br><i>Only common tests should be described solely by name; describe more complex techniques in the Methods section.</i>                                                               |
| <input type="checkbox"/>            | <input checked="" type="checkbox"/> A description of all covariates tested                                                                                                                                                                                                                     |
| <input type="checkbox"/>            | <input checked="" type="checkbox"/> A description of any assumptions or corrections, such as tests of normality and adjustment for multiple comparisons                                                                                                                                        |
| <input type="checkbox"/>            | <input checked="" type="checkbox"/> A full description of the statistical parameters including central tendency (e.g. means) or other basic estimates (e.g. regression coefficient) AND variation (e.g. standard deviation) or associated estimates of uncertainty (e.g. confidence intervals) |
| <input type="checkbox"/>            | <input checked="" type="checkbox"/> For null hypothesis testing, the test statistic (e.g. <i>F</i> , <i>t</i> , <i>r</i> ) with confidence intervals, effect sizes, degrees of freedom and <i>P</i> value noted<br><i>Give P values as exact values whenever suitable.</i>                     |
| <input checked="" type="checkbox"/> | <input type="checkbox"/> For Bayesian analysis, information on the choice of priors and Markov chain Monte Carlo settings                                                                                                                                                                      |
| <input type="checkbox"/>            | <input checked="" type="checkbox"/> For hierarchical and complex designs, identification of the appropriate level for tests and full reporting of outcomes                                                                                                                                     |
| <input type="checkbox"/>            | <input checked="" type="checkbox"/> Estimates of effect sizes (e.g. Cohen's <i>d</i> , Pearson's <i>r</i> ), indicating how they were calculated                                                                                                                                               |

Our web collection on [statistics for biologists](#) contains articles on many of the points above.

Software and code

Policy information about [availability of computer code](#)

|                 |                                                                                                                                                                               |
|-----------------|-------------------------------------------------------------------------------------------------------------------------------------------------------------------------------|
| Data collection | FACS Diva (BD), SH800S (Sony), ZEN Black (Zeiss), Chromium Single Cell 3' Kit v3.1 (10X Genomics), NovaSeq X (Novogene), TimsTOF Pro (Bruker), Q Exactive HF-X (Thermo)       |
| Data analysis   | FlowJo (Treestar), Prism 8 and 9 (GraphPad), R (ggplot2, tidyverse, DESeq2, Seurat), ImageJ/ Fiji (NIH), MaxQuant (Max Planck), Perseus (Max Planck), Spectronaut (Biognosys) |

For manuscripts utilizing custom algorithms or software that are central to the research but not yet described in published literature, software must be made available to editors and reviewers. We strongly encourage code deposition in a community repository (e.g. GitHub). See the Nature Portfolio [guidelines for submitting code & software](#) for further information.

Data

Policy information about [availability of data](#)

All manuscripts must include a [data availability statement](#). This statement should provide the following information, where applicable:

- Accession codes, unique identifiers, or web links for publicly available datasets
- A description of any restrictions on data availability
- For clinical datasets or third party data, please ensure that the statement adheres to our [policy](#)

Raw mass spectrometry data generated in this study have been deposited in the PRIDE database under accession code PXD043964 and PXD058690. Raw sequencing data have been deposited in the NCBI Gene Expression Omnibus (GEO) under accession codes GSE268263 and GSE268642.

## Research involving human participants, their data, or biological material

Policy information about studies with [human participants or human data](#). See also policy information about [sex, gender \(identity/presentation\), and sexual orientation](#) and [race, ethnicity and racism](#).

### Reporting on sex and gender

Use the terms *sex* (biological attribute) and *gender* (shaped by social and cultural circumstances) carefully in order to avoid confusing both terms. Indicate if findings apply to only one sex or gender; describe whether sex and gender were considered in study design; whether sex and/or gender was determined based on self-reporting or assigned and methods used. Provide in the source data disaggregated sex and gender data, where this information has been collected, and if consent has been obtained for sharing of individual-level data; provide overall numbers in this Reporting Summary. Please state if this information has not been collected. Report sex- and gender-based analyses where performed, justify reasons for lack of sex- and gender-based analysis.

### Reporting on race, ethnicity, or other socially relevant groupings

Please specify the socially constructed or socially relevant categorization variable(s) used in your manuscript and explain why they were used. Please note that such variables should not be used as proxies for other socially constructed/relevant variables (for example, race or ethnicity should not be used as a proxy for socioeconomic status). Provide clear definitions of the relevant terms used, how they were provided (by the participants/respondents, the researchers, or third parties), and the method(s) used to classify people into the different categories (e.g. self-report, census or administrative data, social media data, etc.) Please provide details about how you controlled for confounding variables in your analyses.

### Population characteristics

Male and female aged (58-84 years old) cognitively normal and clinically-diagnosed Alzheimer's disease patients.

### Recruitment

Subjects were not recruited specifically for this study. Samples are derived from a brain bank maintained by the Stanford/VA ACRC (Aging Clinical Research Center) from patients that provide consent for broad, de-identified data sharing under Institutional Review Board (IRB) approval.

### Ethics oversight

Stanford/VA Aging Clinical Research Center (ACRC), Stanford Institutional Review Board (IRB)

Note that full information on the approval of the study protocol must also be provided in the manuscript.

## Field-specific reporting

Please select the one below that is the best fit for your research. If you are not sure, read the appropriate sections before making your selection.

☒ Life sciences ☐ Behavioural & social sciences ☐ Ecological, evolutionary & environmental sciences

For a reference copy of the document with all sections, see [nature.com/documents/nr-reporting-summary-flat.pdf](https://www.nature.com/documents/nr-reporting-summary-flat.pdf)

## Life sciences study design

All studies must disclose on these points even when the disclosure is negative.

### Sample size

No power analyses were used to predetermine sample sizes, but sample sizes are similar to those reported in previous publications.

### Data exclusions

None.

### Replication

For in vivo experiments, biological replicates and independent cohorts of mice were used. Data in Figures 1b-d, 1h-o, 2a-b, 2f-j, 3e-n, 4f-i, and 5j-l and Extended Data Figures 2a, 3f-i, 7a-c, 7h-i, and 8h-k were successfully replicated in at least two independent experiments as stated in the "Statistics and reproducibility" section.

### Randomization

For AAV studies, same aged mice were randomly assigned into experimental groups. For other animal studies, cages of young and aged mice at the same veterinary facility were allocated at random for experiments.

### Blinding

Immunohistological analyses, nuclei isolations, and behavioral analyses were performed by a blinded observer. In general, experimenters were blinded to group allocation during data acquisition and analysis.

## Reporting for specific materials, systems and methods

We require information from authors about some types of materials, experimental systems and methods used in many studies. Here, indicate whether each material, system or method listed is relevant to your study. If you are not sure if a list item applies to your research, read the appropriate section before selecting a response.

## Materials &amp; experimental systems

|                                     |                                                                 |
|-------------------------------------|-----------------------------------------------------------------|
| n/a                                 | Involved in the study                                           |
| <input type="checkbox"/>            | <input checked="" type="checkbox"/> Antibodies                  |
| <input type="checkbox"/>            | <input checked="" type="checkbox"/> Eukaryotic cell lines       |
| <input checked="" type="checkbox"/> | <input type="checkbox"/> Palaeontology and archaeology          |
| <input type="checkbox"/>            | <input checked="" type="checkbox"/> Animals and other organisms |
| <input checked="" type="checkbox"/> | <input type="checkbox"/> Clinical data                          |
| <input checked="" type="checkbox"/> | <input type="checkbox"/> Dual use research of concern           |
| <input checked="" type="checkbox"/> | <input type="checkbox"/> Plants                                 |

## Methods

|                                     |                                                    |
|-------------------------------------|----------------------------------------------------|
| n/a                                 | Involved in the study                              |
| <input checked="" type="checkbox"/> | <input type="checkbox"/> ChIP-seq                  |
| <input type="checkbox"/>            | <input checked="" type="checkbox"/> Flow cytometry |
| <input checked="" type="checkbox"/> | <input type="checkbox"/> MRI-based neuroimaging    |

## Antibodies

|                 |                                                                                                                                                                                                                                                                                                                                                                                                                                                                                                                                                                                                                                                                                                                                                                                                                                                                                                                                                                                                                                                                                                                                                                                                                                                                                                                                                                                                                                                                                                                                                                                                                                                                                                                                                                                                                                                              |
|-----------------|--------------------------------------------------------------------------------------------------------------------------------------------------------------------------------------------------------------------------------------------------------------------------------------------------------------------------------------------------------------------------------------------------------------------------------------------------------------------------------------------------------------------------------------------------------------------------------------------------------------------------------------------------------------------------------------------------------------------------------------------------------------------------------------------------------------------------------------------------------------------------------------------------------------------------------------------------------------------------------------------------------------------------------------------------------------------------------------------------------------------------------------------------------------------------------------------------------------------------------------------------------------------------------------------------------------------------------------------------------------------------------------------------------------------------------------------------------------------------------------------------------------------------------------------------------------------------------------------------------------------------------------------------------------------------------------------------------------------------------------------------------------------------------------------------------------------------------------------------------------|
| Antibodies used | <p>Flow cytometry: rat anti-CD31-PE/CF594 (1:100, BD, 563616), rat anti-CD45-PE/Cy7 (1:200, Biolegend, 103114), APC-anti-CD54 (1:100, BioLegend, 116120), FITC-anti-VCAM1 (1:100, Thermo Fisher Scientific, 11-1061-82), AF647-anti-CD62P (1:100, BD Biosciences, 563674), anti-CD62E (1:100, Thermo Fisher Scientific, 14-0627-82), AF647-anti-NeuN (1:100, Abcam, ab190565)</p> <p>Immunostaining primary antibodies: mouse anti-heparan sulfate (1:100, Amsbio, clone 10E4, 370255-1), mouse anti-chondroitin sulfate (1:100, Sigma, clone CD-56, C8035), biotinylated hyaluronan binding protein (HABP) (1:150, Amsbio, AMS.HKD-BC41), rabbit anti-C1galt1 (1:100, Thermo Fisher Scientific, PA5-52814), rabbit anti-B3gnt3 (1:100, Thermo Fisher Scientific, PA5-21988), goat anti-CD31 (1:100, R&amp;D, AF3628), goat anti-Iba1 (1:100, Abcam, ab5076), rat anti-CD68 (1:100, Bio-Rad, MCA1957), goat anti-collagen type IV (1:100, Sigma, AB769), rat anti-NID1 (1:100, Thermo Fisher Scientific, MA1-06501), rabbit anti-CLDN5 (1:100, Thermo Fisher Scientific, 34-1600), mouse anti-ZO1 (1:100, Thermo Fisher Scientific, 33-9100), goat anti-albumin (1:100, Thermo Fisher Scientific, A90-134A), goat anti-PODXL (1:100, R&amp;D Systems, AF1556), rabbit anti-CAV1 (1:100, Cell Signaling Technologies; 3267S), mouse anti-CLTC (1:100, Thermo Fisher Scientific, MA1-065).</p> <p>Immunostaining secondary antibodies: Alexa Fluor 488 donkey anti-goat-IgG (1:250; Invitrogen, A-11055); Alexa Fluor 555 donkey anti-rat-IgG (1:250; Invitrogen, A-48270); Alexa Fluor 555 donkey anti-mouse-IgG (1:250; Invitrogen, A-31570); Alexa Fluor 555 donkey anti-goat-IgG (1:250; Invitrogen, A-21432); Alexa Fluor 647 donkey anti-mouse-IgG (1:250; Invitrogen, A-31571); Alexa Fluor 647 donkey anti-rabbit-IgG (1:250; Invitrogen, A-31573)</p> |
| Validation      | All antibodies were validated for the indicated species and applications by the manufacturer.                                                                                                                                                                                                                                                                                                                                                                                                                                                                                                                                                                                                                                                                                                                                                                                                                                                                                                                                                                                                                                                                                                                                                                                                                                                                                                                                                                                                                                                                                                                                                                                                                                                                                                                                                                |

## Eukaryotic cell lines

Policy information about [cell lines and Sex and Gender in Research](#)

|                                                                   |                                                                                                                                                                                                                                                                                      |
|-------------------------------------------------------------------|--------------------------------------------------------------------------------------------------------------------------------------------------------------------------------------------------------------------------------------------------------------------------------------|
| Cell line source(s)                                               | b.End3 cells (ATCC), HEK293T (Takara)                                                                                                                                                                                                                                                |
| Authentication                                                    | The cell lines were authenticated by the vendors. Immunofluorescence staining of Bend.3 cells for BBB-specific markers of adherens junctions and tight junctions, specifically $\beta$ -catenin, Claudin-5, and VECadherin was used to validate the cell line previously in the lab. |
| Mycoplasma contamination                                          | The cell lines tested negative for mycoplasma contamination.                                                                                                                                                                                                                         |
| Commonly misidentified lines (See <a href="#">ICLAC</a> register) | No commonly misidentified lines were used.                                                                                                                                                                                                                                           |

## Animals and other research organisms

Policy information about [studies involving animals](#); [ARRIVE guidelines](#) recommended for reporting animal research, and [Sex and Gender in Research](#)

|                         |                                                                                                                                                                                                    |
|-------------------------|----------------------------------------------------------------------------------------------------------------------------------------------------------------------------------------------------|
| Laboratory animals      | C57Bl/6 male mice, aged (16-21 months from NIA rodent colony), young (3 months from Jackson Labs). All mice were kept on a 12-h light/dark cycle and provided ad libitum access to food and water. |
| Wild animals            | This study did not involve wild animals.                                                                                                                                                           |
| Reporting on sex        | Only male mice were used in this study.                                                                                                                                                            |
| Field-collected samples | This study did not involve field-collected samples.                                                                                                                                                |
| Ethics oversight        | Institutional Animal Care and Use Committee at Stanford University; V.A. Palo Alto Committee on Animal Research                                                                                    |

Note that full information on the approval of the study protocol must also be provided in the manuscript.

## Flow Cytometry

### Plots

Confirm that:

- ☒ The axis labels state the marker and fluorochrome used (e.g. CD4-FITC).
- ☒ The axis scales are clearly visible. Include numbers along axes only for bottom left plot of group (a 'group' is an analysis of identical markers).
- ☒ All plots are contour plots with outliers or pseudocolor plots.
- ☒ A numerical value for number of cells or percentage (with statistics) is provided.

### Methodology

Sample preparation

Mouse brain microvessels were dissociated enzymatically (papain, collagenase/dispase) or mechanically (dounce, strainer) into single cells which were stained on ice in PBS supplemented with 1% bovine serum albumin and passed through a 100-micron strainer before flow cytometry.  
bEnd.3 cells were detached from plates using enzyme-free cell dissociation buffer and stained for 30 minutes on ice in PBS supplemented with 1% bovine serum albumin and passed through a 100-micron strainer before flow cytometry.

Instrument

BD LSRFortessa; Sony SH800S

Software

BD FACS Diva, Cytobank, FlowJo

Cell population abundance

For glyco-profiling, at least 7,000 brain endothelial cells were analyzed.  
For bEnd.3 experiments, at least 20,000 GFP+ cells were analyzed.

Gating strategy

Positive and negative gates were set using unstained and fluorescence minus one (FMO) background intensity controls.

- ☒ Tick this box to confirm that a figure exemplifying the gating strategy is provided in the Supplementary Information.
